# Supplementary material for: Applications of porous organic frameworks (POFs) in detection of nucleic acid and exonuclease I activity
Source: Royal Society of Chemistry journal article supplement (doi:10.1039/c3tb21461c), 2013-12-11
Supplement: c3tb21461c.pdf [file c3tb21461c.pdf]

## Supporting Information

### Applications of porous organic frameworks (POFs) in detection of nucleic acid and exonuclease I activity

Chan Song,<sup>a,b</sup> Guan-Yao Wang,<sup>a,b</sup> Hui-Zhen Wang,<sup>b,c</sup> Yong-Jian Wang<sup>b,c</sup> and De-Ming Kong<sup>\*a,b</sup>

<sup>a</sup> State Key Laboratory of Medicinal Chemical Biology, College of Chemistry, Nankai University, Tianjin 300071, P R China.

<sup>b</sup> Collaborative Innovation Center of Chemical Science and Engineering (Tianjin), Tianjin 300071, China.

<sup>c</sup> Key Laboratory of Bioactive Materials (Ministry of Education), College of Life Sciences, Nankai University, Tianjin 300071, China.

Email: [kongdem@nankai.edu.cn](mailto:kongdem@nankai.edu.cn); Tel: (+86)-22-23500938; Fax: (+86)-22-23502458

#### 1. Materials

**Table S1** The oligonucleotides used in this work.

| Oligonucleotide                                        | Sequence (5' to 3')           |
|--------------------------------------------------------|-------------------------------|
| <b>P</b> (FAM dye-labeled ssDNA)                       | GGA AGT GTT GAT AAG ATA-(FAM) |
| <b>T</b> (complementary target to <b>P</b> )           | TAT CTT ATC AAC ACT TCC       |
| <b>T1</b> (single-base mismatched target to <b>P</b> ) | TAT CTT ATC TAC ACT TCC       |
| <b>T2</b> (two-base mismatched target to <b>P</b> )    | TAT CTT TTC TAC ACT TCC       |
| <b>T3</b> (three-base mismatched target to <b>P</b> )  | TAT CTT TTC TAC TCT TCC       |
| <b>T4</b> (non-complementary target to <b>P</b> )      | CGA GGC GAT GCC GAA CTC GA    |

## 2. Synthesis and general characterizations of PAF-6

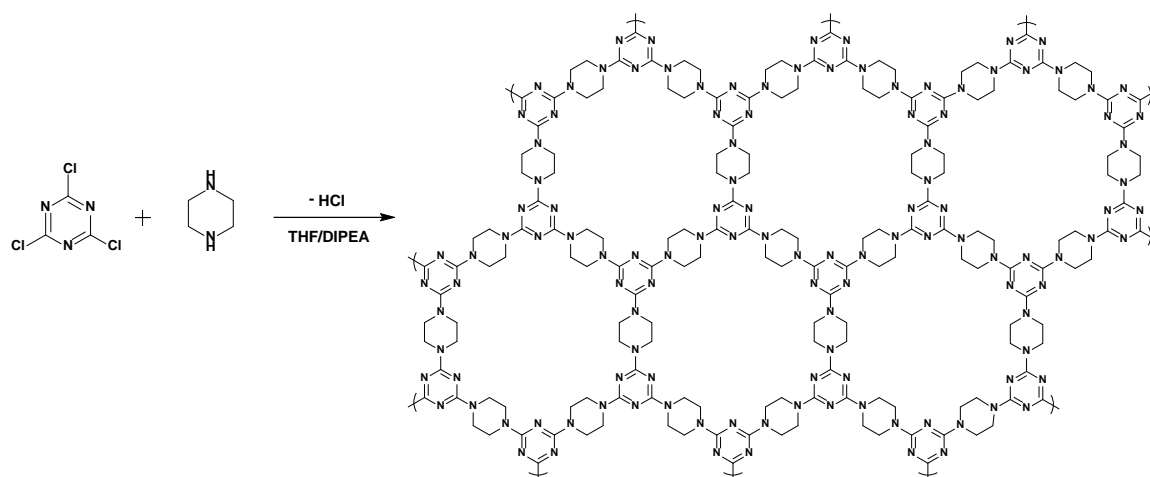

**Fig. S1** The synthesis route of PAF-6.

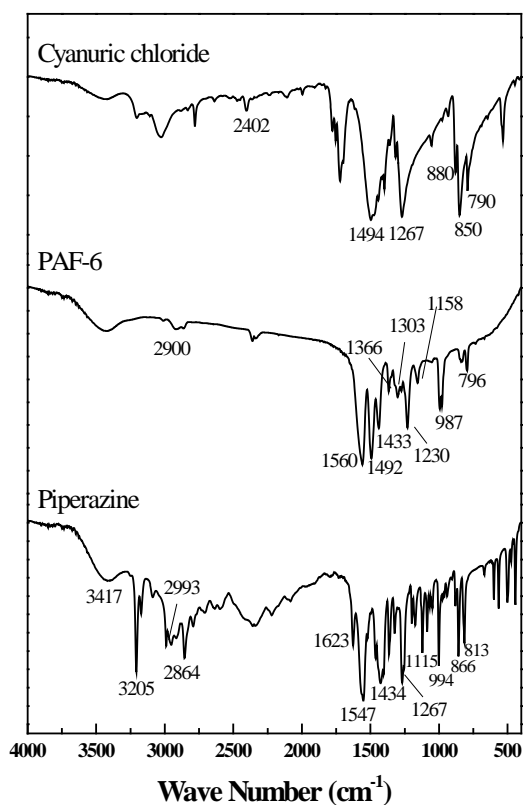

**Fig. S2** IR spectra of cyanuric chloride, PAF-6 and piperazine.

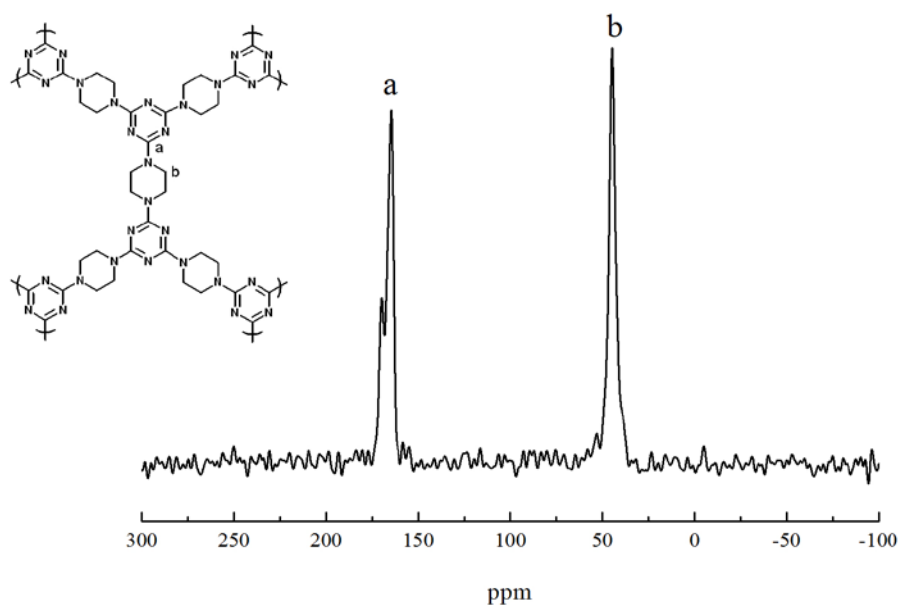

**Fig. S3**  $^{13}\text{C}$  NMR traces of PAF-6.

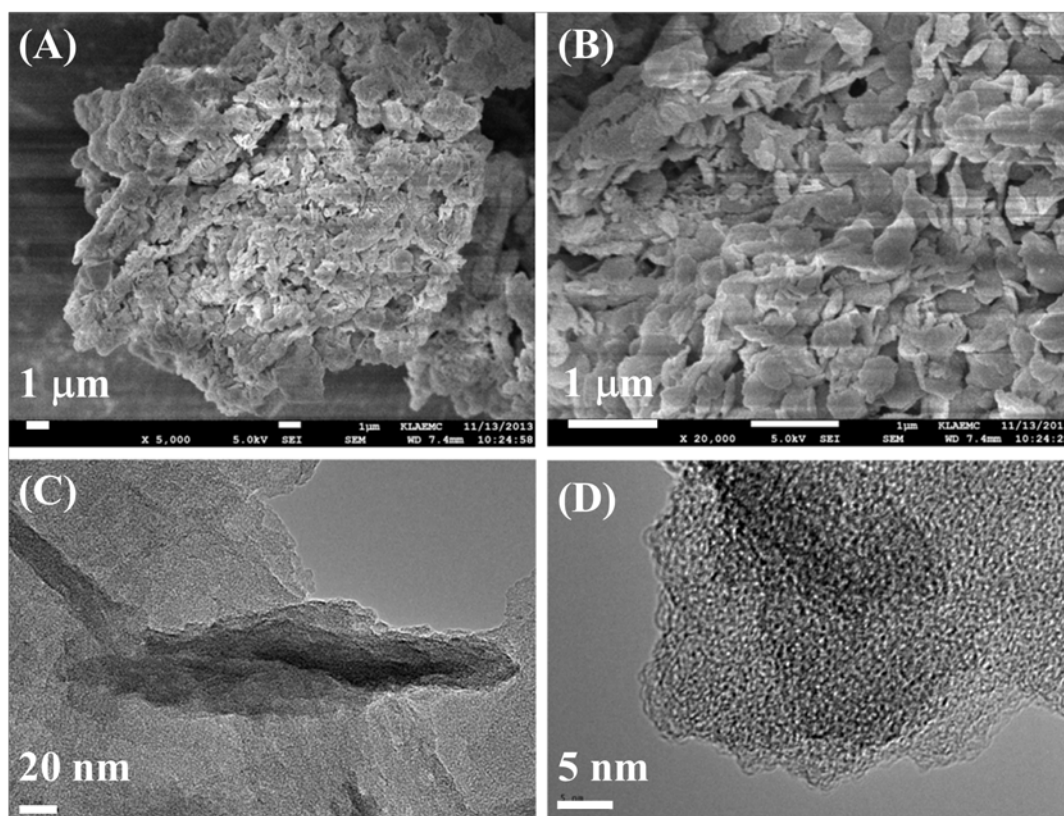

**Fig. S4** Typical SEM (A, B) and TEM (C, D) images of PAF-6.

### 3. Cytotoxicity assay of PAF-6

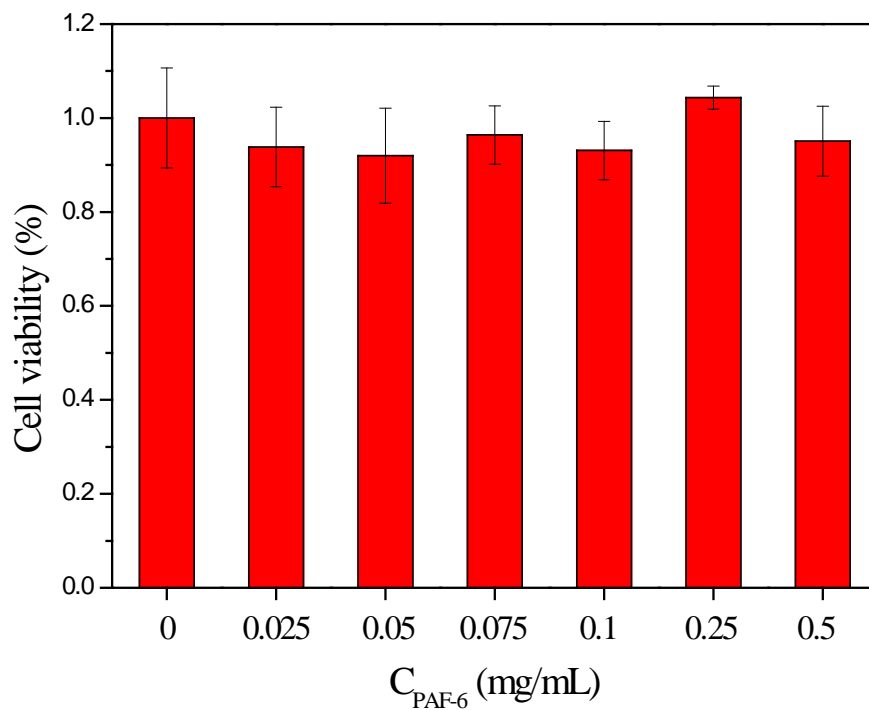

**Fig. S5** Cell viability of MDA-MB-231 cells treated with PAF-6 at different concentrations. Each sample was replicated in five wells.

#### 4. Optimization of experimental conditions for DNA detection

To obtain the best analytical performance, several parameters, including pH, concentrations of PAF-6 and **P**, and incubation time were investigated, respectively. Finally, the following conditions were determined for the assay: 0.05 mg/mL of PAF-6, 50 nM of **P**, and 4 h of incubation time at 37 °C in pH 7.0 buffer.

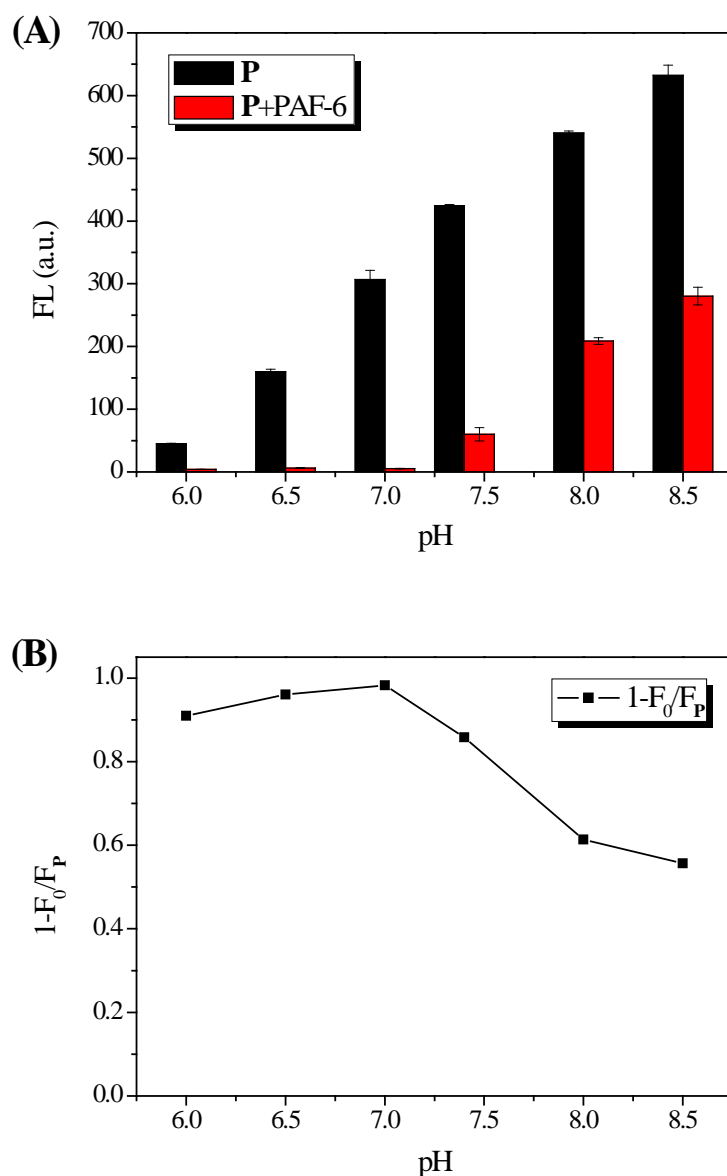

**Fig. S6** (A) Fluorescence of **P** in the absence and presence of PAF-6 under different pH conditions and (B) quenching efficiency ( $1-F_0/F_P$ ) under different pH conditions.  $F_0$  and  $F_P$  are the fluorescence intensities of **P** at 522 nm in the presence and absence of PAF-6, respectively.  $[P] = 50$  nM,  $[PAF-6] = 0.05$  mg/mL. As the quenching efficiency reached maximum at pH 7.0, pH 7.0 was used in subsequent experiments.

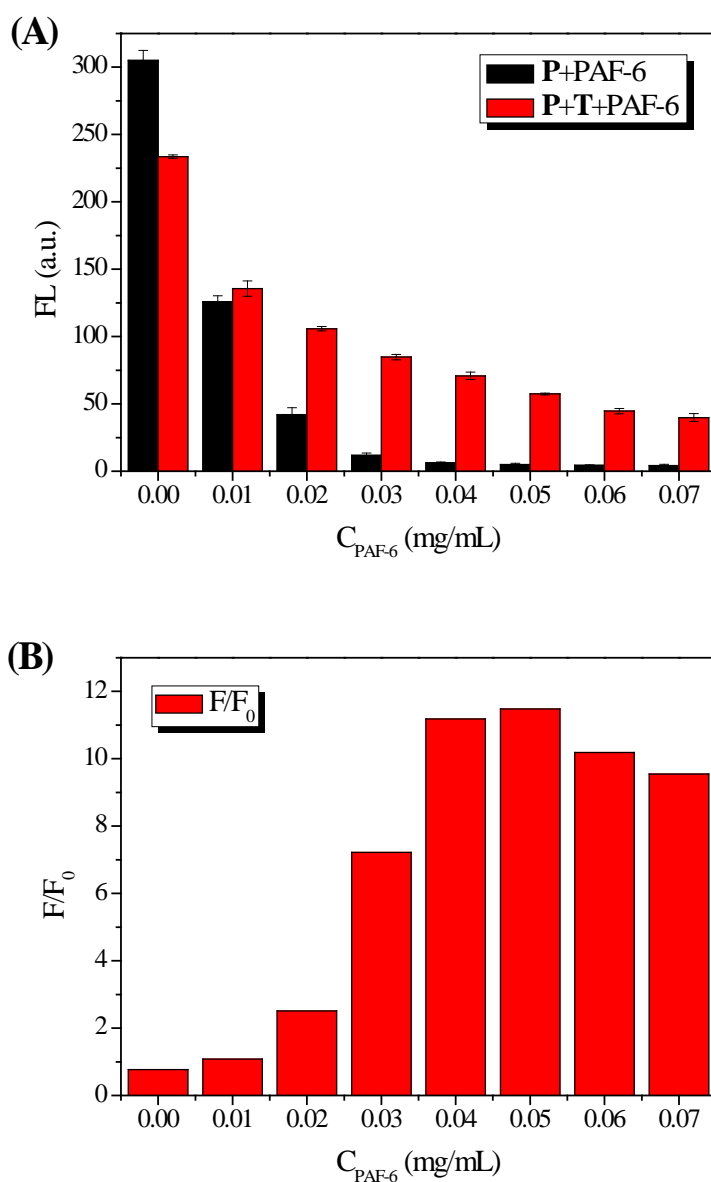

**Fig. S7** (A) Fluorescence and (B) signal-to-noise ( $F/F_0$ ) with different concentrations of PAF-6.  $F$  and  $F_0$  are the fluorescence intensities at 522 nm in the presence and absence of **T** after addition of PAF-6, respectively.  $[\text{P}] = 50 \text{ nM}$ ,  $[\text{T}] = 50 \text{ nM}$ . As the signal-to-noise ( $F/F_0$ ) reached maximum at 0.05 mg/mL PAF-6, 0.05 mg/mL PAF-6 was used in subsequent experiments.

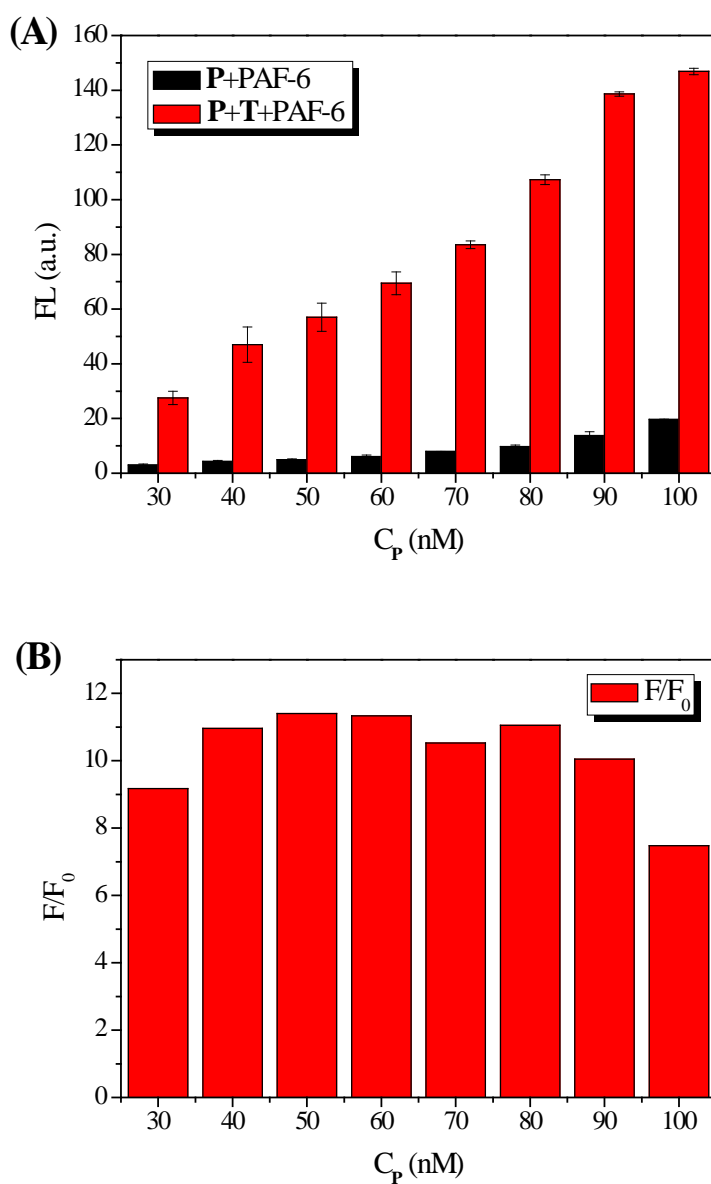

**Fig. S8** (A) Fluorescence and (B) signal-to-noise ( $F/F_0$ ) with different concentrations of **P**.  $F$  and  $F_0$  are the fluorescence intensities at 522 nm in the presence and absence of **T** after addition of PAF-6, respectively.  $[T] = 50$  nM,  $[PAF-6] = 0.05$  mg/mL. As the signal-to-noise ( $F/F_0$ ) reached maximum value at 50 nM of **P**, 50 nM **P** was used in subsequent experiments.

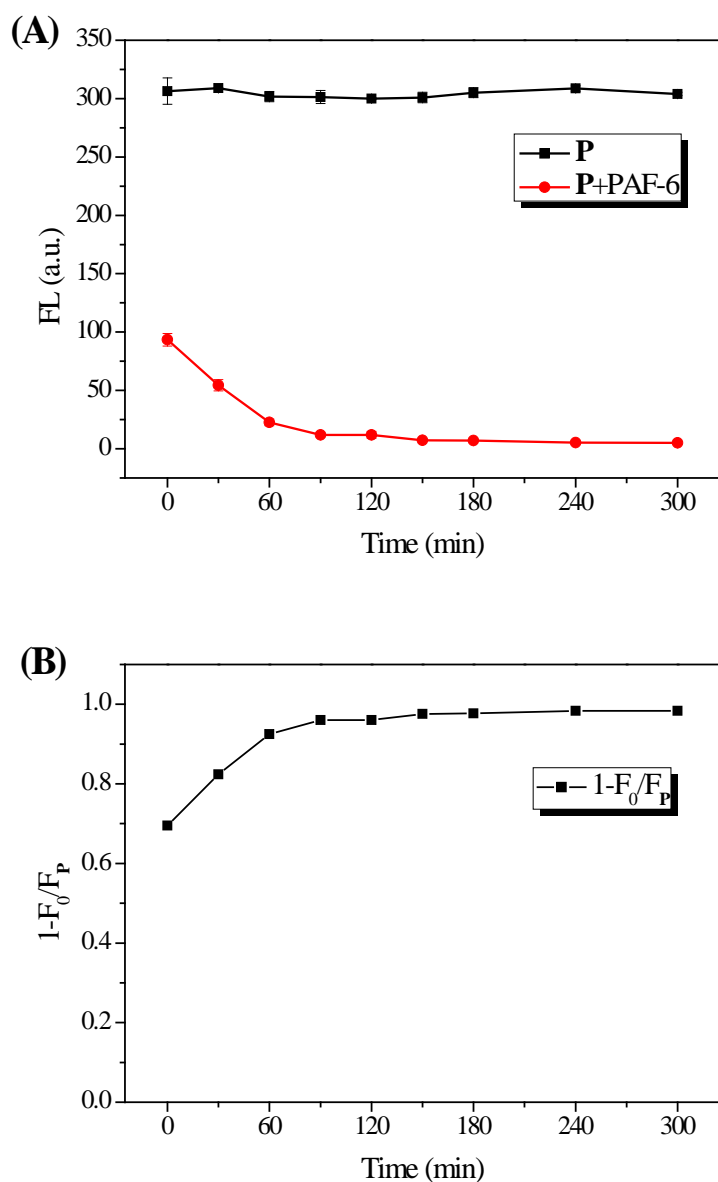

**Fig. S9** (A) Fluorescence of **P** in the absence or presence of PAF-6, and (B) quenching efficiency ( $1-F_0/F_P$ ) versus incubation time at 37 °C. The fluorescence intensity of **P** in the presence of PAF-6 at 0 minute was measured after addition of PAF-6 as soon as possible.  $F_0$  and  $F_P$  are the fluorescence intensities of **P** at 522 nm in the presence and absence of PAF-6, respectively.  $[P] = 50$  nM,  $[PAF-6] = 0.05$  mg/mL.



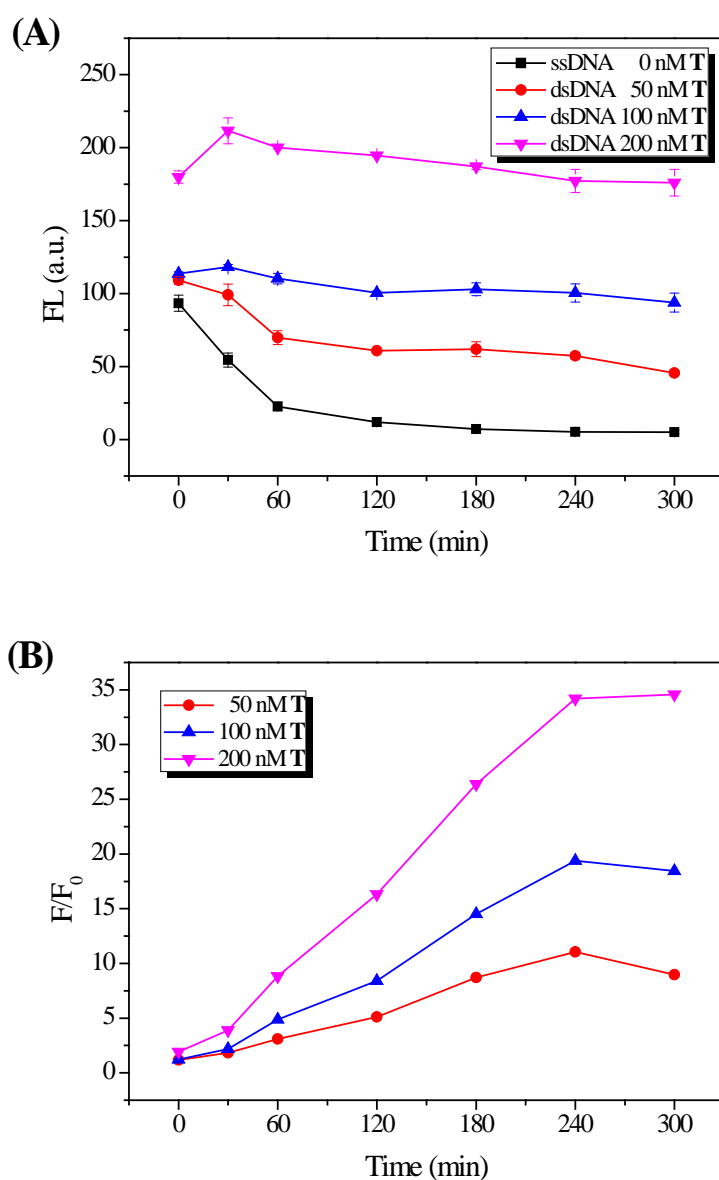

**Fig. S10** (A) Fluorescence of **P** in the presence of different concentrations of **T** upon the addition of PAF-6 and (B) their signal-to-noise ( $F/F_0$ ) versus incubation time at 37 °C. The fluorescence intensities at 0 minute are measured after addition of PAF-6 as soon as possible.  $F$  and  $F_0$  are the fluorescence intensities at 522 nm in the presence and absence of **T** after addition of PAF-6, respectively.  $[P] = 50$  nM,  $[PAF-6] = 0.05$  mg/mL.

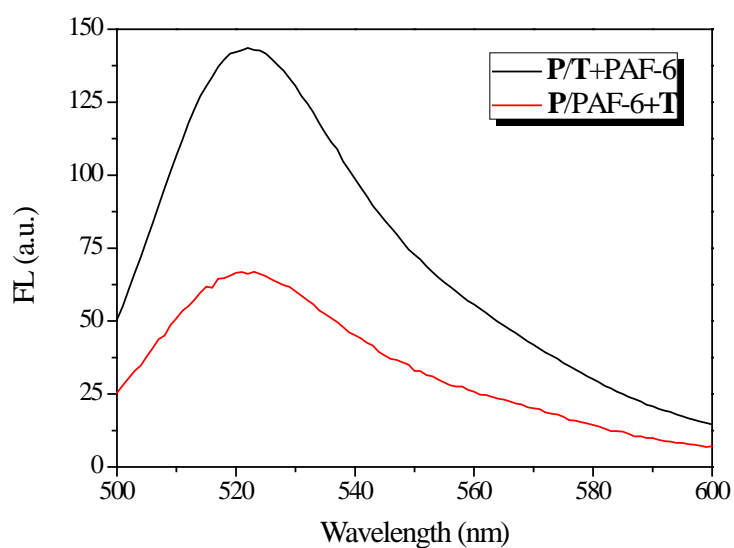

**Fig. S11** Effects of reagent addition order on the performance of the DNA-sensing system. [P] = 50 nM, [T] = 150 nM, [PAF-6] = 0.05 mg/mL.

## 5. Applications of the nucleic acid-sensing method to sample analysis

**Table S2** Recovery of T in 1% human serum samples.

| Sample | T added (M) | Found (nM)  | Recovery (%) |
|--------|-------------|-------------|--------------|
| 1      | 0           | –           | –            |
| 2      | 50.0        | 51.1 ± 1.1  | 102.2 ± 2.1  |
| 3      | 100.0       | 101.5 ± 3.9 | 101.5 ± 3.9  |
| 4      | 150.0       | 147.1 ± 3.7 | 98.0 ± 2.5   |

## 6. Study on the mechanism for the fluorescence quenching of P by PAF-6

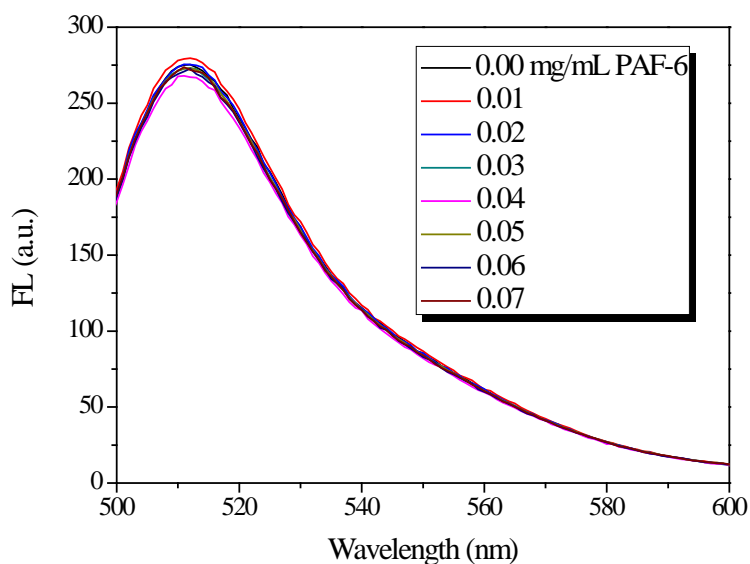

**Fig. S12** Fluorescence emission spectra of free fluorescein (FAM) solution (3 nM) in the presence of different concentrations of PAF-6 with an excitation wavelength of 480 nm.

## 7. UV absorption spectra of PAF-6 in water

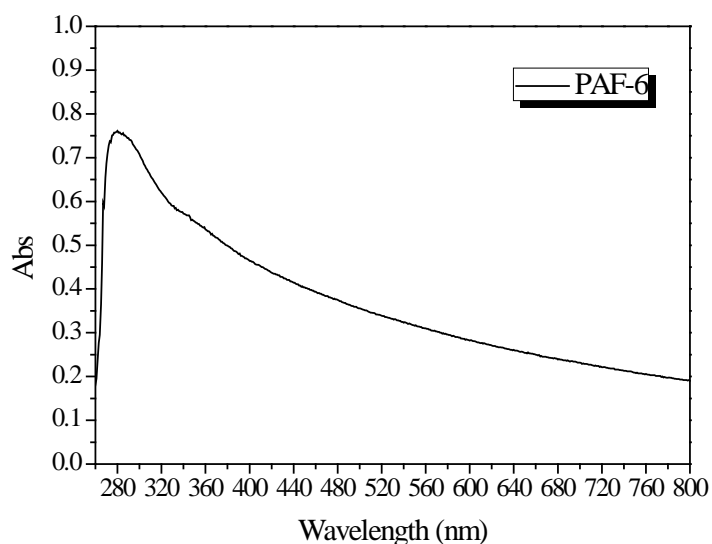

**Fig. S13** UV absorption spectra of 0.025 mg/mL PAF-6 in water.

## 8. Stability study of PAF-6 in solution

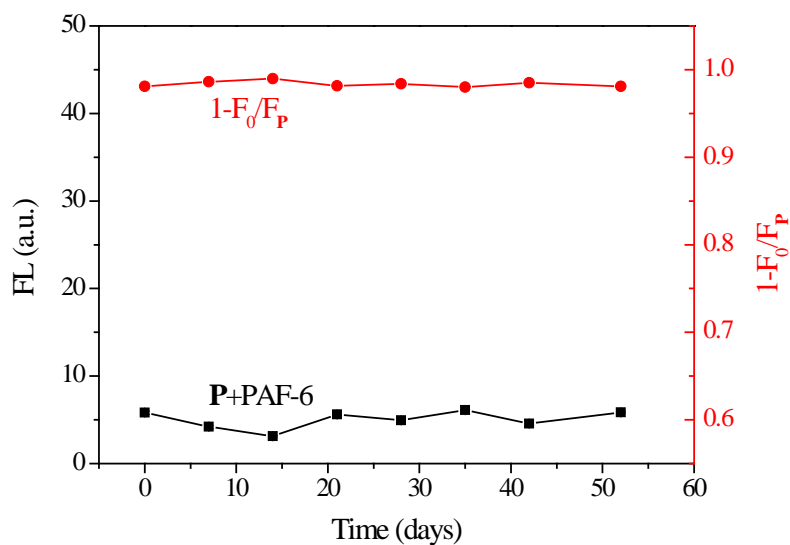

**Fig. S14** Fluorescence of **P** in the presence of PAF-6 (black line) and quenching efficiency ( $1-F_0/F_P$ ) (red line) versus the storage time of the prepared PAF-6. The incubation time of **P** with PAF-6 was 4 h at 37 °C and fluorescence intensity was measured at 522 nm.  $[P] = 50$  nM,  $[PAF-6] = 0.05$  mg/mL.

## 9. Applications of the Exo I activity-sensing method to sample analysis

**Table S3** Recovery of Exo I activity in 1% human serum samples.

| Sample | Exo I added (U/mL) | Found (U/mL)  | Recovery (%)    |
|--------|--------------------|---------------|-----------------|
| 1      | 0                  | –             | –               |
| 2      | 3.0                | $2.8 \pm 0.1$ | $93.0 \pm 3.8$  |
| 3      | 5.0                | $5.2 \pm 0.2$ | $103.3 \pm 3.0$ |
| 4      | 6.0                | $5.8 \pm 0.2$ | $97.1 \pm 3.2$  |
